# Supplementary material for: Influenza C in Lancaster, UK, in the winter of 2014–2015
Source: PubMed Central journal article supplement (PMC5390268; doi:10.1038/srep46578), 2017-04-13
Supplement: srep46578-s5.pdf [file srep46578-s5.pdf]

# Supplementary figures for:

## Influenza C in Lancaster, UK, in the winter of 2014-2015

Kate V Atkinson<sup>1†</sup>, Lisa A Bishop<sup>1,2</sup>, Glenn Rhodes<sup>3</sup>, Nicolas Salez<sup>4</sup>, Neil R McEwan<sup>5</sup>, Matthew J Hegarty<sup>5</sup>, Julie Robey<sup>6</sup>, Nicola Harding<sup>6</sup>, Simon Wetherell<sup>6</sup>, Robert M Lauder<sup>1</sup>, Roger W Pickup<sup>1,3</sup>, Mark Wilkinson<sup>2</sup> & Derek Gatherer<sup>1\*</sup>

<sup>1</sup> Division of Biomedical & Life Sciences, Faculty of Health & Medicine, Lancaster University, Lancaster LA1 4YT, UK

<sup>2</sup>Royal Lancaster Infirmary, Ashton Road, Lancaster LA1 4RP, UK

<sup>3</sup>Centre for Ecology & Hydrology, Lancaster Environment Centre, Lancaster University, Lancaster LA1 4AP, UK

<sup>4</sup>UMR\_D 190, Emergence des Pathologies Virales, Aix-Marseille University, 27 Bd Jean Moulin, 13005 Marseille cedex 05, France

<sup>5</sup>Institute of Biological, Environmental & Rural Sciences, Aberystwyth University, Aberystwyth SY23 3DA, UK

<sup>6</sup>Queen Square Medical Practice, 2 Queen Square, Lancaster LA1 1RP, UK

<sup>†</sup> *Present address:* University College London Hospitals NHS Foundation Trust, London

\* *Contact for correspondence:* Derek Gatherer, email: [d.gatherer@lancaster.ac.uk](mailto:d.gatherer@lancaster.ac.uk), Tel: +44-1524-592900. Division of Biomedical & Life Sciences, Faculty of Health & Medicine, Lancaster University, Lancaster LA1 4YT, UK

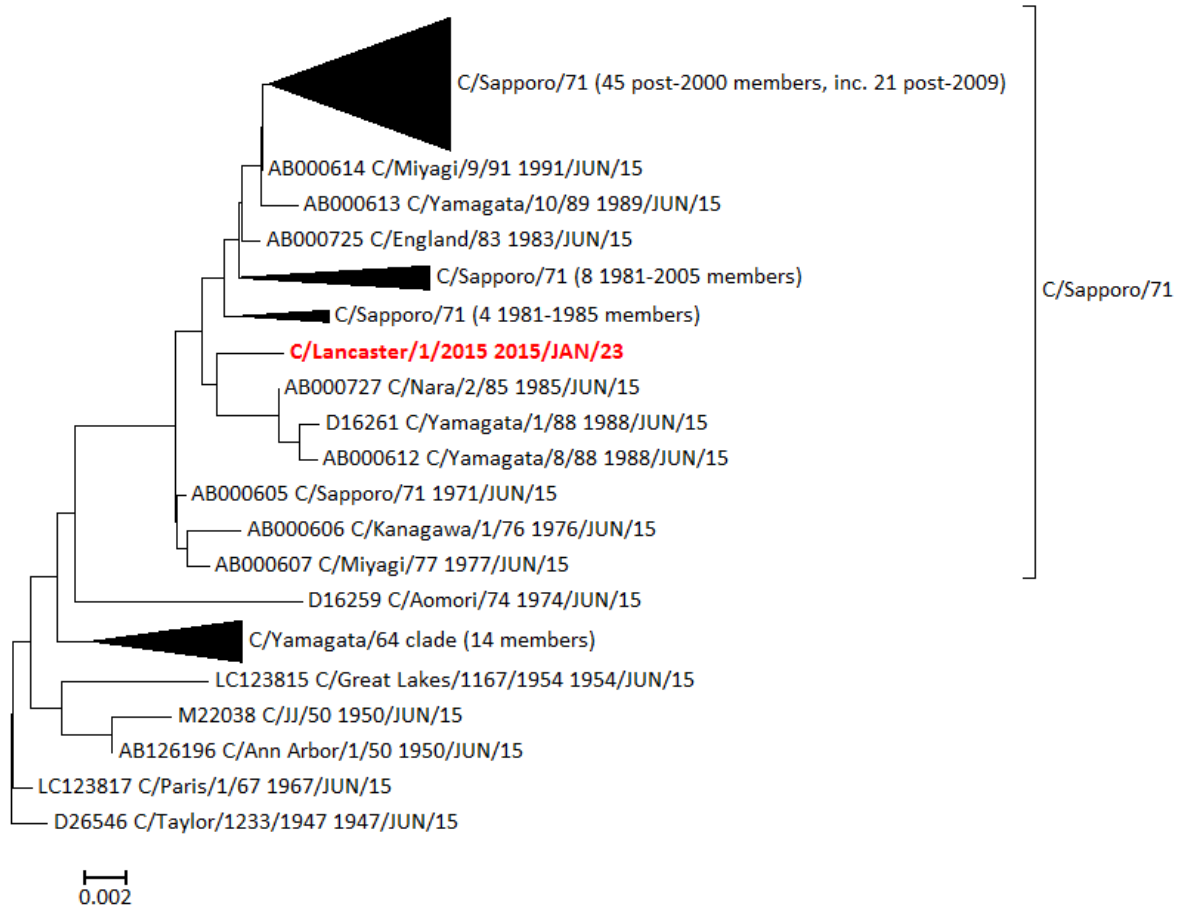

28

29 **Supplementary Figure 1: Neighbour joining tree rooted on C/Taylor/1233/1947 for**  
 30 **segment 6 (M1/CM2), annotated with clades derived from Gatherer<sup>1</sup> and confirmed by**  
 31 **BEAST analysis (see Supplementary Data Pack), demonstrating the closer relationship of**  
 32 **C/Lancaster/1/2015 (red) to M1/CM2 segments of the C/Sapporo/71 clade from the 1980s**  
 33 **than to recent isolates. Scale: substitutions per site.**

34

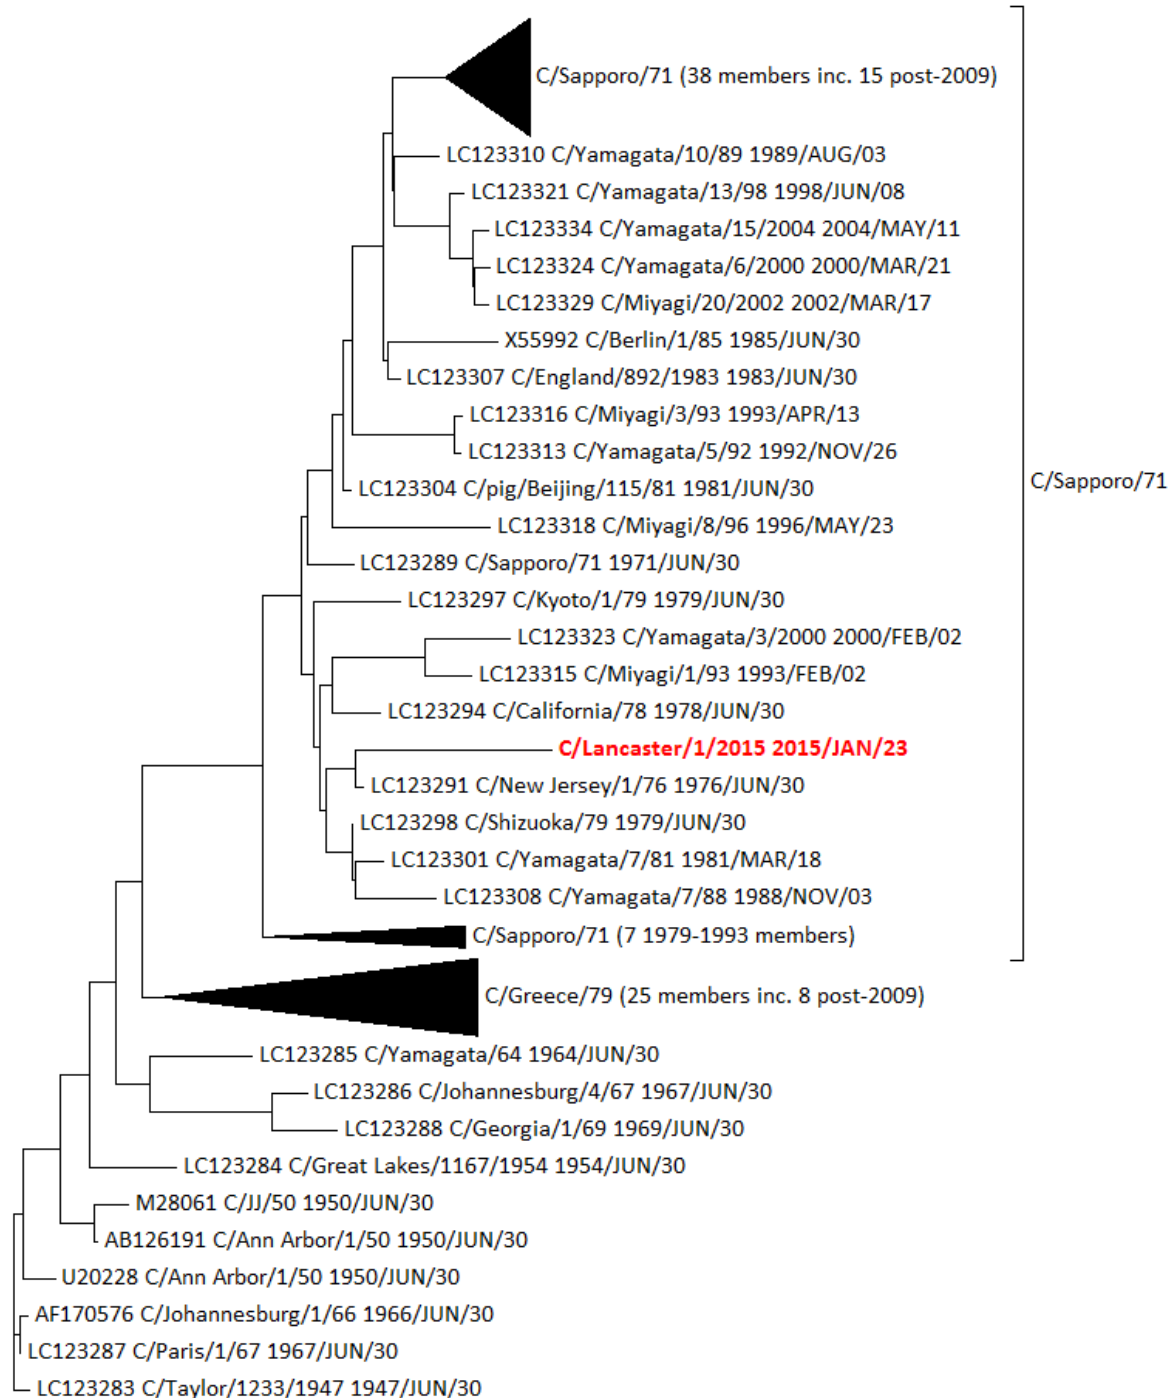

35

0.002

36

**Supplementary Figure 2: Neighbour joining tree rooted on C/Taylor/1233/1947 for**

37

**segment 1 (PB2), annotated with clades derived from Gatherer <sup>1</sup> and confirmed by BEAST**

38

analysis (see Supplementary Data Pack), demonstrating the closer relationship of

39

C/Lancaster/1/2015 (red) to PB2 segments of the C/Sapporo/71 clade from the 1970s and

40

1980s than to recent isolates. Scale: substitutions per site.

41

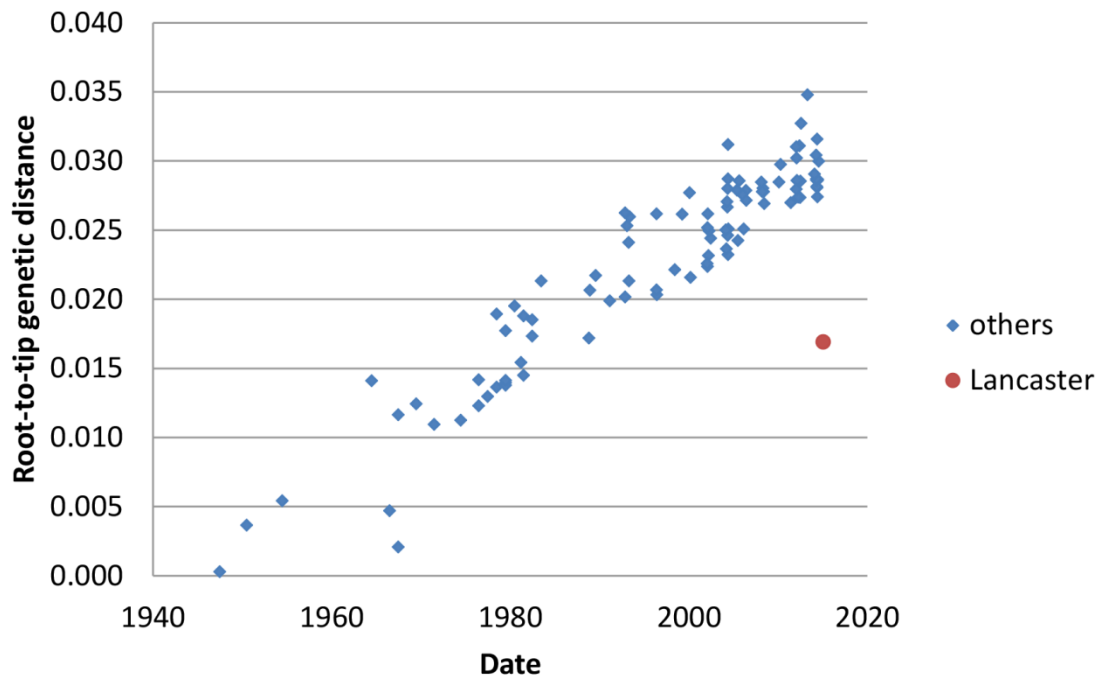

42

43 **Supplementary Figure 3: Root-to-tip distance in a neighbour joining tree for segment 5**  
44 (NP) of the influenza C genome. 96 full-length or near full-length genome segments (1809  
45 bases) are used plus the 397 discontinuous bases of segment 5 derived from deep  
46 sequencing. C/Lancaster/1/2015 is less divergent from the root than it should be given its  
47 known sampling date, consistent with a perturbation of molecular clock-like behaviour in its  
48 lineage.

49

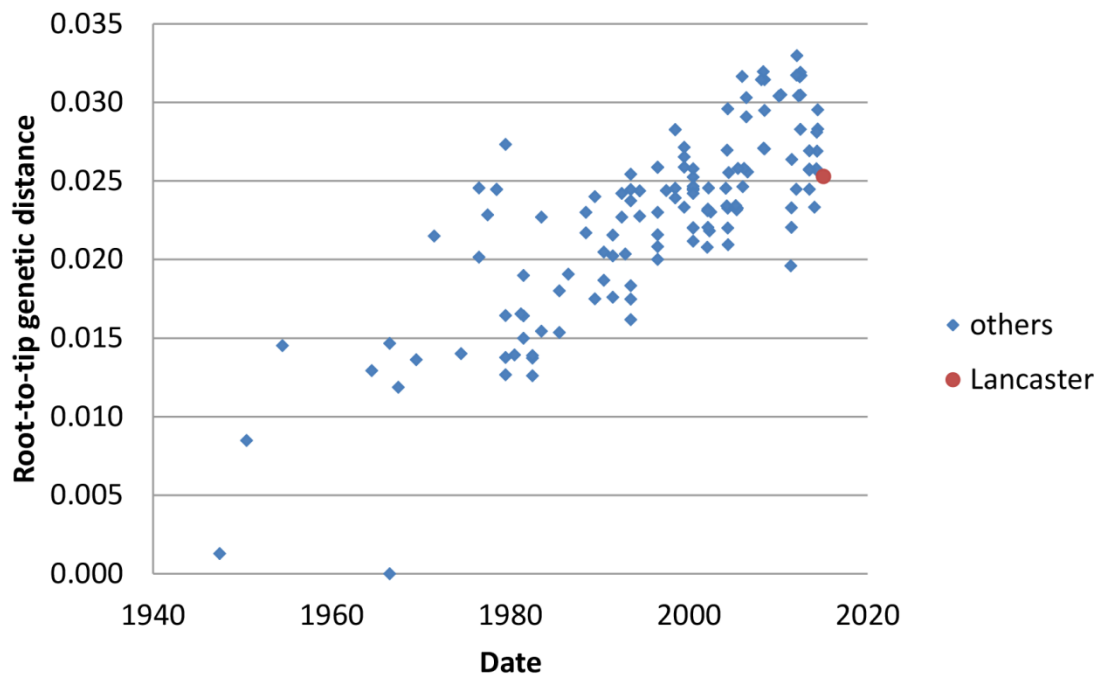

50

51

52 **Supplementary Figure 4: Root-to-tip distance in a neighbour joining tree for segment 7**

53 (NS1/NS2) segment of the influenza C genome. 134 full-length or near full-length genome  
54 segments (935 bases) are used plus the 288 discontinuous bases of segment 7 derived from  
55 deep sequencing. C/Lancaster/1/2015 has a degree of divergence from the root consistent  
56 with molecular clock-like behaviour in its lineage.

57

58

59 **References**

60 1 Gatherer, D. Tempo and mode in the molecular evolution of influenza C. *PLoS currents* **2**,  
61 RRN1199, doi:10.1371/currents.RRN1199 (2010).

62

63
